# Supplementary material for: Subacromial decompression versus diagnostic arthroscopy for shoulder impingement: a 5-year follow-up of a randomised, placebo surgery controlled clinical trial
Source: PubMed Central journal article supplement (PMC7788208; doi:10.1136/bjsports-2020-102216), 2020-10-05
Supplement: bjsports-2020-102216supp001.pdf [file bjsports-2020-102216supp001.pdf]

## **Supplementary Appendix**

This appendix has been provided by the authors to give readers additional information about their work.

**Table of Contents**

|                                                                                                                              |    |
|------------------------------------------------------------------------------------------------------------------------------|----|
| FIMPACT Investigators.....                                                                                                   | 3  |
| Table S1 Trajectories of the primary outcomes at 3, 6, 12, 24 months and 5 years (ASD vs. DA).....                           | 5  |
| Table S2 Trajectories of the secondary outcomes at 3, 6, 12, 24 months and 5 years (ASD vs. DA).....                         | 6  |
| Table S3 Sensitivity analyses of the primary and secondary outcomes concerning the primary comparison<br>(ASD vs. DA).....   | 8  |
| Table S4 Unblindings, treatment conversions, and reoperations.....                                                           | 9  |
| Table S5 Trajectories of the primary outcomes at 3, 6, 12, 24 months and 5 years (ASD vs. ET).....                           | 10 |
| Table S6 Trajectories of the secondary outcomes at 3, 6, 12, 24 months and 5 years (ASD vs. ET).....                         | 11 |
| Table S7 Sensitivity analyses of the primary and secondary outcomes concerning the secondary comparison<br>(ASD vs. ET)..... | 13 |
| Table S8 Frequency of missing data at 3, 6, 12, 24 months and 5 years.....                                                   | 14 |
| Exercise Therapy (ET) Protocol.....                                                                                          | 15 |

**FIMPACT Investigators****Authors:**

Mika Paavola, MD, PhD<sup>1</sup>; Kari Kanto, MD<sup>2,3</sup>; Jonas Ranstam, PhD<sup>4</sup>; Antti Malmivaara, MD, PhD<sup>5</sup>; Jari Inkinen, PT<sup>6</sup>; Juha Kalske, MD<sup>7</sup>; Vesa Savolainen, MD, PhD<sup>8</sup>; Ilkka Sinisaari, MD, PhD<sup>9</sup>; Simo Taimela, MD, PhD<sup>1,2</sup>; Teppo L N Järvinen, MD, PhD<sup>1,2</sup>

**Collaborators:**

Jarkko Pajarinen, MD, PhD<sup>1</sup>; Sikri Tukiainen, MD<sup>10</sup>; Kalevi Hietaniemi, MD, PhD<sup>1</sup>; Vesa Lepola, MD, PhD<sup>11</sup>; Jyrki Salmenkivi, MD<sup>1</sup>; Mikko Salmela, MD, PhD<sup>1</sup>; Timo Järvelä, MD, PhD<sup>12</sup>; Janne Lehtinen, MD, PhD<sup>3</sup>; Ville Haapamäki, MD, PhD<sup>13</sup>; Heikki Kolehmainen, MD, PhD<sup>14</sup>; Mathias Bäck, MD<sup>1</sup>; Mikael Salmela, MD<sup>12</sup>; Tarja Kunnala, PT<sup>7</sup>; Sami Niskanen, PT<sup>8</sup>; Hanna-Mari Laiho, PT<sup>3</sup>; Leena Kangas-Viri, PT<sup>3</sup>; Leena Caravitis, PT<sup>1, 2</sup>; Sanna Hokkanen RN<sup>1</sup>; Sari Karesvuori, RN<sup>7</sup>; Soile Lindholm, RN<sup>1</sup>; Pirjo Toivonen, PT<sup>2</sup>; Eero Hölli, PT<sup>8</sup>; Lena Laine, PT<sup>10</sup> and Esa Läärä, Professor<sup>13</sup>

<sup>1</sup> Department of Orthopedics and Traumatology, Helsinki University Hospital, Töölö hospital, Helsinki, Finland

<sup>2</sup> Finnish Centre for Evidence-Based Orthopedics (FICEBO), University of Helsinki, Helsinki, Finland

<sup>3</sup> Department of Orthopedics and Traumatology, Tampere University Hospital, TAYS Hatanpää, Tampere, Finland

<sup>4</sup> Mdas AB, Ystad, Sweden

<sup>5</sup> National Institute for Health and Welfare, Centre for Health and Social Economics, Helsinki, Finland

<sup>6</sup> Fysios Finlayson, Physiotherapy centre Fysios Finlayson Oy, Tampere, Finland

<sup>7</sup> Department of Orthopedics and Traumatology, Helsinki University Hospital, Jorvi hospital, Espoo, Finland

<sup>8</sup> Pohjola Hospital, Helsinki, Finland

<sup>9</sup> Terveystalo, Helsinki, Finland

<sup>10</sup> Mehiläinen, Helsinki, Finland

<sup>11</sup> Pohjola Hospital, Tampere, Finland

<sup>12</sup> Mehiläinen, Tampere, Finland

<sup>13</sup> HUS Medical Imaging Centre, Helsinki, Finland

<sup>14</sup> Department of Radiology, Tampere University Hospital, TAYS Hatanpää, Tampere, Finland

<sup>16</sup> Research Unit of Mathematical Sciences, University of Oulu, Oulu, Finland

**Contributions:**

**Writing Committee:** MP, KK, ST, and TJ.

**Steering Committee:** MP, ST, AM, and TJ.

**Clinical Sites:****Helsinki University Hospital, Jorvi Hospital, Helsinki:**

Clinical Site Investigators: Kalevi Hietaniemi, Juha Kalske, Vesa Lepola, Jyrki Salmenkivi and Sikri Tukiainen.

Physiotherapy (follow-up examinations): Tarja Kunnala

Imaging: Ville Haapamäki

Research coordinators: Leena Caravitis, Sari Karesvuori

**Helsinki University Hospital, Herttoniemi Hospital, Helsinki:**

Clinical Site Investigators: Jarkko Pajarinen, Mikko Salmela, Vesa Savolainen and Ilkka Sinisaari

Physiotherapy (follow-up examinations): Sami Niskanen

Research coordinators: Leena Caravitis and Soile Lindholm

**Tampere University Hospital, TAYS Hatanpää, Tampere:**

Clinical Site Investigators: Timo Järvelä, Kari Kanto, Janne Lehtinen and Mikael Salmela

Imaging: Heikki Kolehmainen

Physiotherapy (follow-up examinations): Hanna-Mari Laiho and Leena Kangas-Viri

Research coordinator: Pirjo Toivonen.

**Independent Physiotherapists:**

Jari Inkinen, Eero Hölli, Lena Laine

**FIMPACT Methods Center:**

Pirjo Toivonen (Project management), Mathias Bäck (Data management) and Esa Läärä (Randomisation).

**Table S1 Trajectories of the primary outcomes at 3, 6, 12, 24 months and 5 years (ASD vs. DA)**

The table shows the mean values and between-group differences in VAS pain scores at the 3, 6, 12, 24-month and 5-year follow-ups with 95% confidence intervals. The trajectories are estimated using a mixed-effects model repeated measures (MMRM) ANOVA with adjustment for baseline imbalance. N denotes the number of subjects.

| Outcomes                 | Arthroscopic subacromial decompression (ASD) | n  | Diagnostic arthroscopy (DA) | n  | Between-group difference, ASD vs. DA |
|--------------------------|----------------------------------------------|----|-----------------------------|----|--------------------------------------|
| <b>3 months</b>          |                                              |    |                             |    |                                      |
| Pain VAS at rest         | 21.6 (17.0 to 26.3)                          | 54 | 19.8 (15.0 to 24.3)         | 55 | 1.9 (-4.6 to 8.4)                    |
| Pain VAS on arm activity | 42.1 (35.4 to 48.8)                          | 52 | 37.5 (31.0 to 44.0)         | 55 | 4.6 (-4.8 to 14.0)                   |
| <b>6 months</b>          |                                              |    |                             |    |                                      |
| Pain VAS at rest         | 15.9 (11.3 to 20.5)                          | 59 | 13.9 (9.4 to 18.5)          | 61 | 1.9 (-4.3 to 8.2)                    |
| Pain VAS on arm activity | 37.9 (31.5 to 44.4)                          | 59 | 37.7 (31.5 to 43.9)         | 61 | 0.1 (-8.7 to 9.0)                    |
| <b>12 months</b>         |                                              |    |                             |    |                                      |
| Pain VAS at rest         | 11.6 (7.0 to 16.2)                           | 55 | 13.9 (9.6 to 18.3)          | 56 | -1.5 (-8.0 to 4.9)                   |
| Pain VAS on arm activity | 23.3 (16.7 to 29.8)                          | 55 | 28.0 (21.5 to 34.4)         | 56 | -4.7 (-13.8 to 4.5)                  |
| <b>24 months</b>         |                                              |    |                             |    |                                      |
| Pain VAS at rest         | 5.2 (0.8 to 9.6)                             | 59 | 9.8 (5.2 to 14.2)           | 59 | -4.6 (-10.8 to 1.7)                  |
| Pain VAS on arm activity | 15.8 (9.5 to 22.1)                           | 59 | 24.8 (18.5 to 31.1)         | 59 | -9.0 (-17.9 to 0)                    |
| <b>5 years</b>           |                                              |    |                             |    |                                      |
| Pain VAS at rest         | 6.2 (1.6 to 10.8)                            | 54 | 8.2 (3.5 to 12.8)           | 54 | -2.0 (-8.5 to 4.6)                   |
| Pain VAS on arm activity | 12.4 (5.8 to 19.0)                           | 54 | 20.4 (13.8 to 26.9)         | 54 | -8.0 (-17.3 to 1.3)                  |

The between-group differences may not exactly equal the differences in change in the scores between the ASD and DA groups because of the adjustment for baseline imbalance in the MMRM analyses. A negative between-group difference means that the participants in the ASD group reported a lower pain level.

The minor discrepancies in the results of the ASD group in this Table S2 and in the Table S6 are due to the adjustment for baseline imbalance when analysing change from baseline. The adjustment differs based on which groups are included in the model.

**Table S2 Trajectories of the secondary outcomes at 3, 6, 12, 24 months and 5 years (ASD vs. DA)**

The table shows the mean values and between-group differences in VAS pain scores at the 3, 6, 12 and 24-month and 5-year follow-ups with 95% confidence intervals. The trajectories are estimated using a mixed-effects model repeated measures (MMRM) ANOVA with adjustment for baseline imbalance. N denotes the number of subjects.

| Outcomes                                  | Arthroscopic subacromial decompression (ASD) | n  | Diagnostic arthroscopy (DA) | n  | Between-group difference ASD vs. DA |
|-------------------------------------------|----------------------------------------------|----|-----------------------------|----|-------------------------------------|
| <b>3 months</b>                           |                                              |    |                             |    |                                     |
| Constant-Murley score                     | N/A                                          |    | N/A                         |    | N/A                                 |
| SST                                       | N/A                                          |    | N/A                         |    | N/A                                 |
| Satisfaction to the treatment (0-100 VAS) | 76.9 (71.9 to 82.0)                          | 57 | 81.4 (76.3 to 86.4)         | 57 | -4.5 (-11.6 to 2.7)                 |
| 15-D                                      | 0.91 (0.90 to 0.92)                          | 57 | 0.92 (0.91 to 0.93)         | 57 | -0.01 (-0.02 to 0.01)               |
| SF-36 score Physical health               | 81.6 (78.3 to 84.8)                          | 58 | 83.2 (79.9 to 86.5)         | 57 | -1.6 (-6.2 to 3.0)                  |
| Mental health                             | 79.8 (77.0 to 82.7)                          | 58 | 83.2 (80.3 to 86.1)         | 57 | -3.3 (-7.4 to 0.8)                  |
| <b>6 months</b>                           |                                              |    |                             |    |                                     |
| Constant-Murley score                     | 58.2 (54.0 to 62.4)                          | 59 | 64.4 (60.2 to 68.5)         | 61 | -6.1 (-12.1 to 0.2)                 |
| SST                                       | 7.9 (7.4 to 8.5)                             | 59 | 8.5 (7.9 to 9.1)            | 61 | -0.5 (-1.4 to 0.3)                  |
| Satisfaction to the treatment (0-100 VAS) | 75.1 (70.1 to 80.2)                          | 56 | 79.7 (74.7 to 84.7)         | 58 | -4.5 (-11.7 to 2.6)                 |
| 15-D                                      | 0.92 (0.90 to 0.93)                          | 56 | 0.92 (0.91 to 0.94)         | 58 | -0.01 (-0.02 to 0.01)               |
| SF-36 score Physical health               | 84.9 (81.6 to 88.1)                          | 57 | 84.7 (81.5 to 88.0)         | 58 | 0.1 (-4.5 to 4.8)                   |
| Mental health                             | 80.6 (77.7 to 83.5)                          | 57 | 82.3 (79.4 to 85.1)         | 59 | -1.6 (-5.7 to 2.5)                  |
| <b>12 months</b>                          |                                              |    |                             |    |                                     |
| Constant-Murley score                     | N/A                                          |    | N/A                         |    | N/A                                 |
| SST                                       | N/A                                          |    | N/A                         |    | N/A                                 |
| Satisfaction to the treatment (0-100 VAS) | 82.9 (77.8 to 88.0)                          | 55 | 85.9 (80.7 to 91.0)         | 54 | -2.9 (-10.2 to 4.3)                 |
| 15-D                                      | 0.92 (0.91 to 0.93)                          | 56 | 0.93 (0.92 to 0.94)         | 55 | -0.01 (-0.03 to 0)                  |
| SF-36 score Physical health               | 86.9 (83.6 to 90.1)                          | 56 | 85.3 (82.0 to 88.6)         | 56 | 1.5 (-3.2 to 6.2)                   |
| Mental health                             | 77.0 (74.1 to 80.0)                          | 55 | 85.2 (82.2 to 88.2)         | 57 | -8.2 (-12.4 to 4.0)                 |
| <b>24 months</b>                          |                                              |    |                             |    |                                     |
| Constant-Murley score                     | 78.0 (73.7 to 82.3)                          | 58 | 73.8 (69.6 to 78.0)         | 59 | 4.2 (-1.8 to 10.2)                  |
| SST                                       | 10.4 (9.8 to 11.0)                           | 58 | 9.9 (9.3 to 10.5)           | 59 | 0.4 (-0.4 to 1.3)                   |
| Satisfaction to the treatment (0-100 VAS) | 88.2 (83.2 to 93.3)                          | 58 | 87.4 (82.4 to 92.5)         | 56 | 0.8 (-6.3 to 7.9)                   |
| 15-D                                      | 0.92 (0.91 to 0.93)                          | 58 | 0.92 (0.91 to 0.94)         | 58 | -0.0 (-0.02 to 0.01)                |

|                                           |                     |    |                     |    |                       |
|-------------------------------------------|---------------------|----|---------------------|----|-----------------------|
| SF-36 score Physical health               | 87.6 (84.4 to 90.9) | 58 | 86.1 (82.9 to 89.4) | 58 | 1.5 (-3.1 to 6.1)     |
| Mental health                             | 77.9 (75.0 to 80.8) | 57 | 82.6 (79.7 to 85.5) | 59 | -4.7 (-8.8 to 0.6)    |
| <b>5 years</b>                            |                     |    |                     |    |                       |
| Constant-Murley score                     | 82.8 (78.4 to 87.3) | 58 | 75.7 (71.3 to 80.1) | 59 | 7.1 (-0.9 to 13.4)    |
| SST                                       | 10.7 (10.1 to 11.3) | 58 | 10.3 (9.7 to 11.0)  | 59 | 0.3 (-0.5 to 1.2)     |
| Satisfaction to the treatment (0-100 VAS) | 89.7 (84.5 to 94.9) | 58 | 85.7 (80.6 to 90.8) | 56 | 4.0 (-3.2 to 11.3)    |
| 15-D                                      | 0.92 (0.90 to 0.92) | 58 | 0.92 (0.90 to 0.93) | 58 | -0.01 (-0.03 to 0.01) |
| SF-36 score Physical health               | 84.0 (80.6 to 87.4) | 58 | 85.4 (82.0 to 88.8) | 57 | -1.4 (-6.1 to 3.4)    |
| Mental health                             | 79.9 (76.9 to 82.9) | 57 | 80.1 (77.0 to 83.2) | 57 | -0.2 (-4.5 to 4.1)    |

The between-group differences may not exactly equal the differences in change in the scores between the ASD and DA groups because of the adjustment for baseline imbalance in the MMRM analyses. N/A = not applicable. For all variables, a higher score indicates a better treatment outcome.

**Table S3 Sensitivity analyses of the primary and secondary outcomes concerning the primary comparison (ASD vs. DA)**

The table shows the between-group differences at the 5-year follow up. The estimated effect indicates the mean difference, ASD minus DA. The analyses were carried out using a mixed model repeated measures (MMRM) ANOVA with adjustment for baseline imbalance.

| Variable                                     | ITT<br>Estimated effect (95%<br>CI)* | P<br>value | Per protocol<br>Estimated effect (95% CI)† | P<br>value | As treated<br>Estimated effect (95% CI)‡ | P<br>value |
|----------------------------------------------|--------------------------------------|------------|--------------------------------------------|------------|------------------------------------------|------------|
| Pain VAS at rest                             | -2.0 (-8.5 to 4.6)                   | 0.56       | -4.0 (-10.5 to 2.5)                        | 0.23       | -5.9 (-12.4 to 0.6)                      | 0.077      |
| Pain VAS at activity                         | -8.0 (-17.3 to 1.3)                  | 0.092      | -9.9 (-19.4 to -0.2)                       | 0.046      | -9.5 (-18.6 to -0.3)                     | 0.043      |
| Constant-Murley score                        | 7.1 (0.9 to 13.4)                    | 0.025      | 7.5 (1.1 to 13.8)                          | 0.021      | 6.3 (0.1 to 12.5)                        | 0.046      |
| SST                                          | 0.3 (-0.5 to 1.2)                    | 0.45       | 0.4 (-0.5 to 1.3)                          | 0.37       | 0.6 (-0.3 to 1.4)                        | 0.20       |
| Satisfaction to the treatment<br>(VAS 0-100) | 4.0 (-3.2 to 11.3)                   | 0.28       | 5.6 (-1.9 to 13.1)                         | 0.14       | 5.1 (-2.2 to 12.4)                       | 0.17       |
| 15-D                                         | -0.01 (-0.03 to 0.01)                | 0.32       | -0.01 (-0.03 to 0.01)                      | 0.32       | -0.01 (-0.03 to 0.01)                    | 0.32       |
| SF-36 score Physical health                  | -1.4 (-6.1 to 3.4)                   | 0.58       | -0.9 (-5.8 to 4.1)                         | 0.73       | -0.1 (-4.8 to 4.6)                       | 0.97       |
| Mental health                                | -0.2 (-4.5 to 4.1)                   | 0.92       | 0.5 (-3.9 to 5.1)                          | 0.81       | 0.8 (-3.5 to 5.1)                        | 0.71       |

\* ITT, the intention to treat population (ASD: n = 59, DA: n = 63).

† The per protocol population is the subset of the intention to treat population who received the treatment they were randomised to and who did not receive any other treatment, i.e. the patients with a treatment conversion have been excluded (ASD: n = 59, DA: n = 54).

‡ The as treated population is defined according to the treatment the participants received, i.e. the 9 participants who originally received DA and the 14 participants who originally received ET, but due to persistent symptoms requested unblinding and subsequently received ASD, have been included in the ASD population (ASD: n = 83, DA: n = 54).



**Table S4 Unblindings, treatment conversions, and reoperations**

| Study group | Unblinding or decision on treatment conversion. Time from randomisation (Months) | Treatment converted to* | Reoperations | Time from randomisation to reoperation (months) |
|-------------|----------------------------------------------------------------------------------|-------------------------|--------------|-------------------------------------------------|
| ET          | 2                                                                                | ASD                     |              |                                                 |
| ET          | 5                                                                                | ASD                     | MUA and ADCR | 10                                              |
| ET          | 6                                                                                | ASD and MUA             |              |                                                 |
| ET          | 7                                                                                | ASD                     |              |                                                 |
| ET          | 7                                                                                | ASD                     |              |                                                 |
| ET          | 7                                                                                | ASD                     | ASD and LHBT | 23                                              |
| ET          | 7                                                                                | ASD                     |              |                                                 |
| ET          | 7                                                                                | ASD                     |              |                                                 |
| ET          | 8                                                                                | ASD                     |              |                                                 |
| ET          | 8                                                                                | ASD                     |              |                                                 |
| ET          | 9                                                                                | ASD                     | ASD and ADCR | 57                                              |
| ET          | 11                                                                               | ASD                     |              |                                                 |
| ET          | 12                                                                               | ASD                     |              |                                                 |
| ET          | 15                                                                               | ADCR                    |              |                                                 |
| ET          | 21                                                                               | ACR and ASD             |              |                                                 |
| ET          | 55                                                                               | ASD                     |              |                                                 |
| ASD         | 3                                                                                |                         |              |                                                 |
| ASD         | 8                                                                                |                         |              |                                                 |
| ASD         | 8                                                                                | MUA                     |              |                                                 |
| ASD         | 13                                                                               |                         |              |                                                 |
| ASD         | 14                                                                               |                         |              |                                                 |
| ASD         | 18                                                                               | ADCR                    | ASD and ADCR | 51                                              |
| DA          | 1                                                                                | ASD                     |              |                                                 |
| DA          | 5                                                                                | ASD                     |              |                                                 |
| DA          | 6                                                                                |                         |              |                                                 |
| DA          | 9                                                                                | ASD                     |              |                                                 |
| DA          | 9                                                                                | ASD                     |              |                                                 |
| DA          | 9                                                                                | ASD                     |              |                                                 |
| DA          | 11                                                                               | ASD                     |              |                                                 |
| DA          | 12                                                                               | ASD                     |              |                                                 |
| DA          | 19                                                                               | ASD and SSC repair      |              |                                                 |
| DA          | 25                                                                               |                         |              |                                                 |
| DA          | 26                                                                               | ASD and DPC             |              |                                                 |
| DA          | 55                                                                               | SSP repair (trauma)     |              |                                                 |

Abbreviations: ASD=Arthroscopic Subacromial Decompression; ACR=Arthroscopic Capsular Release; MUA=Manipulation Under Anesthesia; ADCR=Arthroscopic Distal Clavicle Resection; LHBT=Long Head of the Biceps Tendon; SSC repair=Subscapularis tendon repair; SSP repair=Supraspinatus tendon repair; DPC= Drainage of a paralabral cyst.

\*Treatment conversions (surgeries) were carried out within 4 months of unblinding (mean: 6 weeks, range 1-16 weeks).

**Table S5 Trajectories of the primary outcomes at 3, 6, 12, 24 months and 5 years (ASD vs. ET)**

The table shows the mean values and between-group differences in VAS pain scores at the 3, 6, 12, 24-month and 5-year follow-ups with 95% confidence intervals. The trajectories are estimated using a mixed-effects model repeated measures (MMRM) ANOVA with adjustment for baseline imbalance. N denotes the number of subjects.

| Outcomes                 | Arthroscopic subacromial decompression (ASD) | n  | Exercise Therapy (ET) | n  | Between-group difference, ASD vs. ET |
|--------------------------|----------------------------------------------|----|-----------------------|----|--------------------------------------|
| <b>3 months</b>          |                                              |    |                       |    |                                      |
| Pain VAS at rest         | 21.7 (17.0 to 26.5)                          | 54 | 23.8 (19.4 to 28.3)   | 62 | -2.1 (-8.7 to 4.4)                   |
| Pain VAS on arm activity | 42.3 (35.7 to 49.0)                          | 52 | 44.7 (38.7 to 50.8)   | 62 | -2.4 (-11.5 to 7.0)                  |
| <b>6 months</b>          |                                              |    |                       |    |                                      |
| Pain VAS at rest         | 15.9 (11.4 to 20.5)                          | 59 | 16.9 (12.6 to 21.2)   | 68 | -0.9 (-7.2 to 5.4)                   |
| Pain VAS on arm activity | 38.1 (31.8 to 44.4)                          | 59 | 44.6 (38.7 to 50.5)   | 68 | -6.5 (-15.1 to 2.1)                  |
| <b>12 months</b>         |                                              |    |                       |    |                                      |
| Pain VAS at rest         | 11.6 (6.9 to 16.4)                           | 55 | 17.1 (12.8 to 21.5)   | 65 | -5.5 (-11.9 to 0.9)                  |
| Pain VAS on arm activity | 23.5 (17.0 to 30.0)                          | 55 | 33.1 (27.1 to 39.1)   | 64 | -9.6 (-18.4 to -0.8)                 |
| <b>24 months</b>         |                                              |    |                       |    |                                      |
| Pain VAS at rest         | 5.3 (0.7 to 9.9)                             | 59 | 12.8 (8.5 to 17.1)    | 68 | -7.5 (-13.8 to -1.2)                 |
| Pain VAS on arm activity | 16.0 (9.7 to 22.3)                           | 59 | 28.1 (22.2 to 34.0)   | 68 | -12.1 (-20.7 to -3.5)                |
| <b>5 years</b>           |                                              |    |                       |    |                                      |
| Pain VAS at rest         | 6.3 (1.5 to 11.0)                            | 59 | 5.3 (0.8 to 9.8)      | 68 | -1.0 (-5.6 to 7.6)                   |
| Pain VAS on arm activity | 12.6 (6.1 to 19.2)                           | 59 | 16.5 (10.3 to 22.6)   | 68 | -3.9 (-12.8 to 5.1)                  |

The between-group differences may not exactly equal the differences in change in the scores between the ASD and DA groups because of the adjustment for baseline imbalance in the MMRM analyses. A negative between-group difference means that the participants in the ASD group reported a lower pain level.

The minor discrepancies in the results of the ASD group in this Table S6 and in the Table S2 are due to the adjustment for baseline imbalance when analysing change from baseline. The adjustment differs based on which groups are included in the model.

**Table S6 Trajectories of the secondary outcomes at 3, 6, 12, 24 months and 5 years (ASD vs. ET)**

The table shows the mean values and between-group differences in VAS pain scores at the 3, 6, 12, 24-month and 5-year follow-ups with 95% confidence intervals. The trajectories are estimated using a mixed-effects model repeated measures (MMRM) ANOVA with adjustment for baseline imbalance. N denotes the number of subjects.

| Outcomes                                  | Arthroscopic subacromial decompression (ASD) | n  | Exercise Therapy (ET) | n  | Between-group difference ASD vs. ET |
|-------------------------------------------|----------------------------------------------|----|-----------------------|----|-------------------------------------|
| <b>3 months</b>                           |                                              |    |                       |    |                                     |
| Constant-Murley score                     | N/A                                          |    | N/A                   |    | N/A                                 |
| SST                                       | N/A                                          |    | N/A                   |    | N/A                                 |
| Satisfaction to the treatment (0-100 VAS) | 76.9 (71.8 to 82.0)                          | 57 | 79.3 (74.5 to 84.0)   | 67 | -2.3 (-9.3 to 4.6)                  |
| 15-D                                      | 0.91 (0.89 to 0.92)                          | 57 | 0.90 (0.89 to 0.91)   | 65 | 0.01 (-0.01 to 0.30)                |
| SF-36 score Physical health               | 81.8 (78.9 to 84.8)                          | 58 | 81.3 (78.5 to 84.0)   | 66 | 0.6 (-3.5 to 4.6)                   |
| Mental health                             | 79.1 (76.0 to 82.2)                          | 58 | 80.2 (77.3 to 83.2)   | 67 | -1.1 (-5.4 to 3.2)                  |
| <b>6 months</b>                           |                                              |    |                       |    |                                     |
| Constant-Murley score                     | 59.1 (54.8 to 63.4)                          | 59 | 58.3 (54.3 to 62.3)   | 68 | 0.8 (-5.0 to 6.7)                   |
| SST                                       | 7.9 (7.3 to 8.5)                             | 59 | 7.9 (7.4 to 8.5)      | 68 | 0.0 (-0.80 to 0.80)                 |
| Satisfaction to the treatment (0-100 VAS) | 75.2 (67.0 to 80.3)                          | 56 | 75.2 (70.4 to 80.0)   | 66 | -0.0 (-7.1 to 7.0)                  |
| 15-D                                      | 0.91 (0.90 to 0.93)                          | 56 | 0.89 (0.88 to 0.90)   | 66 | 0.02 (0 to 0.04)                    |
| SF-36 score Physical health               | 85.1 (82.1 to 88.1)                          | 57 | 81.3 (78.6 to 84.1)   | 67 | 3.8 (-0.2 to 7.8)                   |
| Mental health                             | 79.9 (76.7 to 83.0)                          | 57 | 80.4 (77.4 to 83.3)   | 67 | -0.5 (-4.8 to 3.8)                  |
| <b>12 months</b>                          |                                              |    |                       |    |                                     |
| Constant-Murley score                     | N/A                                          |    | N/A                   |    | N/A                                 |
| SST                                       | N/A                                          |    | N/A                   |    | N/A                                 |
| Satisfaction to the treatment (0-100 VAS) | 82.9 (77.7 to 88.1)                          | 55 | 78.0 (73.2 to 82.9)   | 64 | 4.9 (-2.2 to 12.0)                  |
| 15-D                                      | 0.91 (0.90 to 0.93)                          | 56 | 0.91 (0.89 to 0.92)   | 64 | 0.01 (-0.01 to 0.03)                |
| SF-36 score Physical health               | 87.1 (84.1 to 90.1)                          | 56 | 86.5 (83.6 to 89.3)   | 64 | 0.6 (-3.5 to 4.7)                   |
| Mental health                             | 76.3 (73.1 to 79.5)                          | 55 | 81.8 (78.7 to 84.8)   | 64 | -5.5 (-9.9 to 1.1)                  |
| <b>24 months</b>                          |                                              |    |                       |    |                                     |
| Constant-Murley score                     | 78.9 (74.6 to 83.2)                          | 58 | 71.3 (67.3 to 75.4)   | 65 | 7.5 (1.6 to 13.4)                   |
| SST                                       | 10.3 (9.7 to 10.9)                           | 58 | 9.7 (9.1 to 10.2)     | 66 | 0.7 (-0.1 to 1.5)                   |
| Satisfaction to the treatment (0-100 VAS) | 88.2 (83.1 to 93.4)                          | 58 | 84.8 (80.1 to 89.6)   | 67 | 3.4 (-3.5 to 10.4)                  |
| 15-D                                      | 0.92 (0.90 to 0.93)                          | 56 | 0.91 (0.90 to 0.92)   | 68 | 0.00 (-0.01 to 0.02)                |
| SF-36 score Physical health               | 87.9 (85.0 to 90.8)                          | 58 | 87.3 (84.5 to 90.0)   | 68 | 0.6 (-3.4 to 4.6)                   |
| Mental health                             | 77.2 (74.0 to 80.3)                          | 57 | 82.8 (79.8 to 85.7)   | 68 | -5.6 (-9.9 to -1.3)                 |

| <b>5 years</b>                            |                     |    |                     |    |                       |
|-------------------------------------------|---------------------|----|---------------------|----|-----------------------|
| Constant-Murley score                     | 83.7 (79.2 to 88.1) | 58 | 79.8 (75.6 to 88.1) | 65 | 3.9 (2.2 to 10.0)     |
| SST                                       | 10.6 (10.0 to 11.3) | 58 | 10.7 (10.1 to 11.2) | 66 | 0.0 (-0.9 to 0.8)     |
| Satisfaction to the treatment (0-100 VAS) | 89.7 (84.4 to 95.0) | 58 | 86.8 (81.8 to 91.7) | 67 | 3.0 (-4.3 to 10.2)    |
| 15-D                                      | 0.90 (0.89 to 0.91) | 56 | 0.91 (0.90 to 0.93) | 68 | -0.01 (-0.03 to 0.01) |
| SF-36 score Physical health               | 84.3 (81.2 to 87.3) | 52 | 87.5 (84.7 to 90.4) | 62 | -3.3 (-7.4 to 0.9)    |
| Mental health                             | 79.2 (75.9 to 82.4) | 52 | 81.9 (78.8 to 84.9) | 62 | -2.7 (-7.2 to 1.8)    |

The between-group differences may not exactly equal the differences in change in the scores between the ASD and ET groups because of the adjustment for baseline imbalance in the MMRM analyses. N/A = not applicable. For all variables, a higher score indicates a better treatment outcome.

**Table S7 Sensitivity analyses of the primary and secondary outcomes concerning the secondary comparison (ASD vs. ET)**

The table shows the between-group differences at the 5-year follow-up. The estimated effect indicates the mean difference, ASD minus ET. The analyses were carried out using a mixed model repeated measures (MMRM) ANOVA with adjustment for baseline imbalance.

| Variable                              | FAS Estimated effect (95% CI)* | P value | Per protocol Estimated effect (95% CI)† | P value | As treated Estimated effect (95% CI)‡ | P value |
|---------------------------------------|--------------------------------|---------|-----------------------------------------|---------|---------------------------------------|---------|
| Pain VAS at rest                      | 1.0 (-5.6 to 7.6)              | 0.77    | 0.2 (-6.5 to 6.9)                       | 0.96    | -1.5 (-8.2 to 5.1)                    | 0.65    |
| Pain VAS at activity                  | -3.9 (-12.8 to 5.1)            | 0.40    | -3.6 (-12.9 to 5.7)                     | 0.45    | -3.2 (-12.1 to 5.7)                   | 0.48    |
| Constant-Murley score                 | 3.9 (-2.3 to 10.0)             | 0.22    | 3.5 (-2.8 to 10.7)                      | 0.28    | 2.7 (-3.5 to 8.8)                     | 0.40    |
| SST                                   | -0 (-0.8 to 0.9)               | 0.70    | 0.2 (-0.7 to 1.0)                       | 0.70    | 0.3 (-0.5 to 1.1)                     | 0.43    |
| Satisfaction to treatment (0-100 VAS) | 3.0 (-4.3 to 10.2)             | 0.42    | 2.0 (-5.2 to 9.3)                       | 0.58    | 1.5 (-5.6 to 8.7)                     | 0.67    |
| 15-D                                  | -0.01 (-0.03 to 0.01)          | 0.32    | -0.02 (-0.03 to -0)                     | 0.046   | -0.02 (-0.03 to 0)                    | 0.046   |
| SF-36 score Physical health           | -3.3 (-7.4 to 0.9)             | 0.13    | -3.8 (-8.1 to 0.4)                      | 0.074   | -2.9 (-7.1 to 1.3)                    | 0.17    |
| Mental health                         | -2.7 (-7.2 to 1.8)             | 0.23    | -4.0 (-8.7 to 0.6)                      | 0.089   | -3.81 (-8.2 to 0.6)                   | 0.089   |

\* FAS, the full analysis set population (ASD: n = 59, ET: n = 71).

† The per protocol population is the subset of the full analysis set population who received the treatment they were randomised to and who did not receive any other treatment, i.e. the patients with a treatment conversion have been excluded (ASD: n = 59, ET: n = 56).

‡ The as treated population is defined according to the treatment the participants received, i.e., the 9 participants who originally received DA and the 15 participants who originally received ET, but due to persistent symptoms requested unblinding and subsequently received ASD, have been included in the ASD population (ASD: n = 83, ET: n = 56).

**Table S8 Frequency of missing data at 3, 6, 12, 24 months and 5 years**

| Study group   | Timepoint | Pain VAS at rest | Pain VAS at activity | Constant-Murley score | SST | 15D |
|---------------|-----------|------------------|----------------------|-----------------------|-----|-----|
| ASD<br>(n=59) | Baseline  | 0                | 0                    | 0                     | 0   | 2   |
|               | 3 months  | 5                | 7                    | N/A                   | N/A | 2   |
|               | 6 months  | 0                | 0                    | 0                     | 0   | 3   |
|               | 12 months | 4                | 4                    | N/A                   | N/A | 2   |
|               | 24 months | 0                | 0                    | 1                     | 1   | 1   |
|               | 5 years   | 5                | 5                    | 5                     | 7   | 6   |
| DA<br>(n=63)  | Baseline  | 0                | 0                    | 0                     | 0   | 3   |
|               | 3 months  | 8                | 8                    | N/A                   | N/A | 6   |
|               | 6 months  | 2                | 2                    | 2                     | 2   | 5   |
|               | 12 months | 7                | 7                    | N/A                   | N/A | 8   |
|               | 24 months | 4                | 4                    | 4                     | 4   | 5   |
|               | 5 years   | 9                | 9                    | 9                     | 10  | 12  |
| ET<br>(n=71)  | Baseline  | 1                | 1                    | 1                     | 1   | 2   |
|               | 3 months  | 9                | 9                    | N/A                   | N/A | 6   |
|               | 6 months  | 3                | 3                    | 3                     | 3   | 5   |
|               | 12 months | 6                | 7                    | N/A                   | N/A | 7   |
|               | 24 months | 3                | 3                    | 6                     | 5   | 3   |
|               | 5 years   | 9                | 9                    | 11                    | 9   | 12  |

Abbreviations: ASD = Arthroscopic Subacromial Decompression; DA = Diagnostic arthroscopy; ET = Exercise therapy; VAS = Visual analogue scale; SST = Simple Shoulder Test.

The n values denote the number of participants allocated to each treatment group. The frequencies include both missing data and withdrawn subjects.

**Exercise Therapy (ET) Protocol**

|                                                                                                                                                    |                                                                                                                                                    |
|----------------------------------------------------------------------------------------------------------------------------------------------------|----------------------------------------------------------------------------------------------------------------------------------------------------|
| <b>Phase I (weeks 0-3)</b>                                                                                                                         |                                                                                                                                                    |
| <b>Goals: Decrease pain, restore A/PROM, relieve pain and inflammation, re-establish muscular balance, and improve posture; Inform the patient</b> |                                                                                                                                                    |
| <b>Passive exercises:</b><br>PROM<br>Joint mobilisation/posterior capsule stretching<br>Soft tissue mobilisation                                   | <b>Active exercises:</b><br>AAROM<br>Submaximal isometric rotator cuff exercises<br>Thoracic spine mobilisation<br>Scapular retraction/protraction |
| <b>Phase II (weeks 4-5)</b>                                                                                                                        |                                                                                                                                                    |
| <b>Goals: Re-establish full and pain free AROM, restore rotator cuff strength, restore normal scapulothoracic motion</b>                           |                                                                                                                                                    |
| <b>Passive exercises:</b><br>Joint mobilisation/posterior capsule stretching<br>Soft tissue mobilisation                                           | <b>Active exercises:</b><br>AROM<br>Maximal isometric rotator cuff exercises<br>Thoracic spine mobilisation<br>Scapulothoracic motion              |
| <b>Phase III (weeks 6-8)</b>                                                                                                                       |                                                                                                                                                    |
| <b>Goals: Restore muscle strength and endurance, re-establish full and pain free AROM. Restore normal scapulothoracic motion</b>                   |                                                                                                                                                    |
| <b>Passive exercises:</b><br>Joint mobilisation                                                                                                    | <b>Active exercises:</b><br>Dynamic rotator cuff exercises<br>Scapulothoracic motion                                                               |
| <b>Phase IV (weeks 9-12)</b>                                                                                                                       |                                                                                                                                                    |
| <b>Goals: Enhance muscle strength and endurance, re-educate neuromuscular control of rotator cuff muscles</b>                                      |                                                                                                                                                    |
| <b>Passive exercises:</b><br>Continued stretching program                                                                                          | <b>Active exercises:</b><br>Continued dynamic rotator cuff program                                                                                 |

Abbreviations: PROM, Passive range of motion; AAROM, Active-assisted range of motion; AROM: Active range of motion

**Exercise therapy (ET) group: home exercise program****Phase I (0-3 weeks)**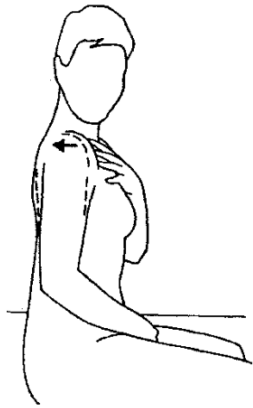

© PhysioTools Ltd

Sit. Place your hand on the front of the opposite shoulder. Feel your shoulder with your fingers making sure that the shoulder does not come forward. Move your shoulder gently 1 cm back and 2 cm up. Later on, exercise is done without palpation or visual confirmation of movement.

Repeat 3 x 15-25 times.

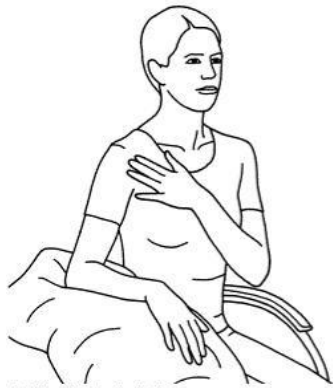

©PhysioTools Ltd

Sit. Place your hand on the front of the opposite shoulder. Feel your shoulder with your fingers. Move your shoulder gently 1 cm forward and 2 up from resting position. Later on, exercise is done without palpation or visual confirmation of movement.

Repeat 3 x 15-25 times.



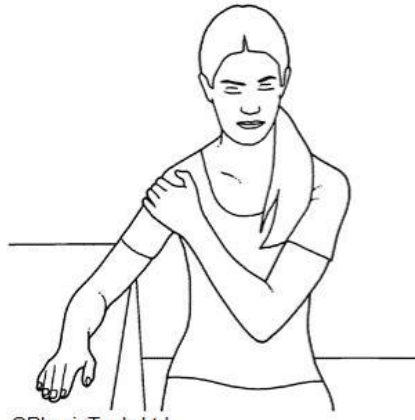

©PhysioTools Ltd

Sit on a chair with your arm supported on a table.  
With your other hand push the top of your upper arm downwards.  
Hold approx. 2 secs

Repeat 10 times.

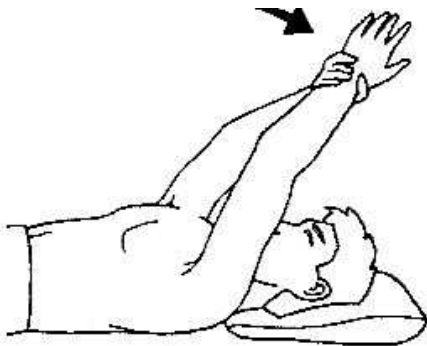

© PhysioTools Ltd

Lying on your back with elbows straight. Use one arm to lift the other  
arm up keeping it as close to the ear as possible.

Repeat 10 times.

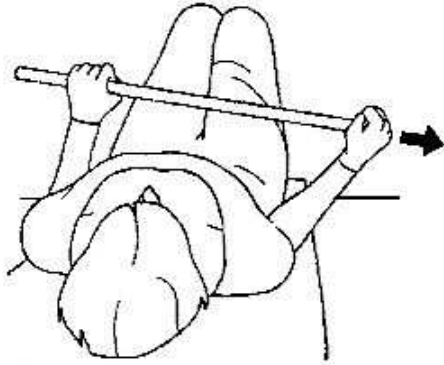

© PhysioTools Ltd

Lying on your back with elbows against your body and at a right angle. Hold a stick in your hands. Move the stick sideways thus pushing the arm to be exercised outwards.

Repeat 10 times.

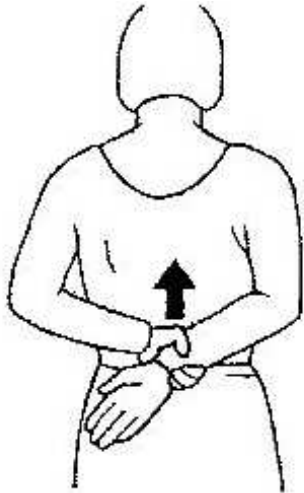

© PhysioTools Ltd

Stand with arms behind your back. Grasp the wrist of the arm you want to exercise. Slide your hands up the back.

Repeat 10 times.

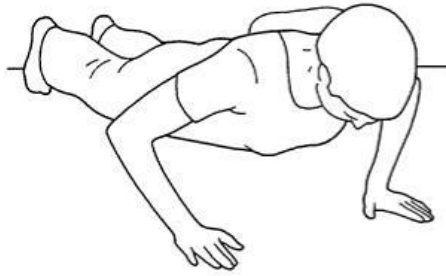

©PhysioTools Ltd

Lying face down with your hands on the floor at shoulder height. Do push-ups slowly and remember to straighten your elbows properly.

Repeat 3 x 15-25 times.

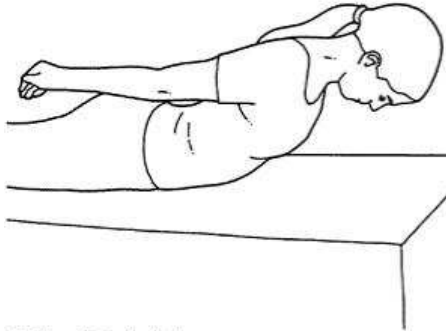

©PhysioTools Ltd

Lying face down, arms behind your back. Lift your upper trunk off the floor and pull your shoulder blades together. Look down at the floor while doing the exercise.

Repeat 3 x 15-25 times.

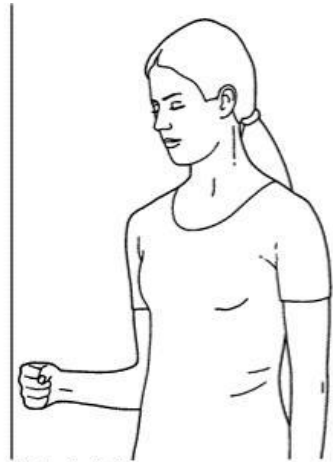

©PhysioTools Ltd

Stand sideways against a wall with your upper arm close to your side and elbow at a right angle. Push the forearm to the side against the wall. Hold approx. 5 secs.

Repeat 3 x 3 times.

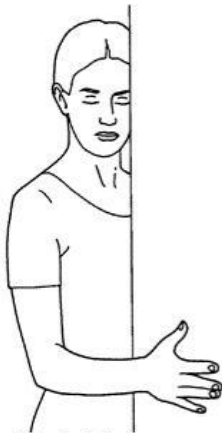

©PhysioTools Ltd

Stand in a doorway with you elbow close to your body and bent at a right angle. Place your hand against the wall. Push your hand inwards against the wall. Hold 5 secs. Relax.

Repeat 3 x 3 times.

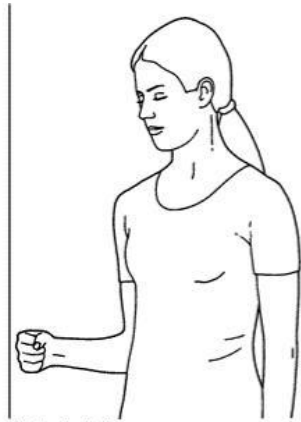

©PhysioTools Ltd

Stand with your upper arm close to your side, elbow at a right angle and the back of your hand against a wall. Push the back of your hand against the wall. Hold approx. 5secs.

Repeat 3 x 3times.

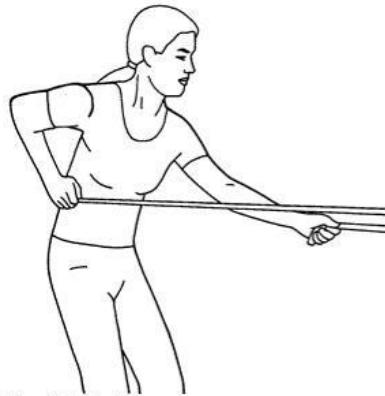

©PhysioTools Ltd

Stand facing a rubber exercise band with your knees and hips slightly bent. Pull the band alternately with the left and right hand keeping the pelvis still.

Repeat 3 x 15-25 times.

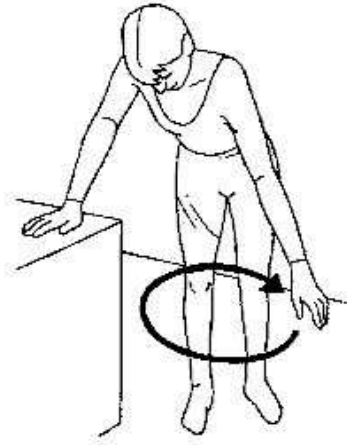

© PhysioTools Ltd

Stand leaning on a table with one hand. Let your other arm hang relaxed straight down. Swing your arm as if drawing a circle on the floor. Change direction.

Continue for 1-2 minutes

**Phase II (4-5 weeks)**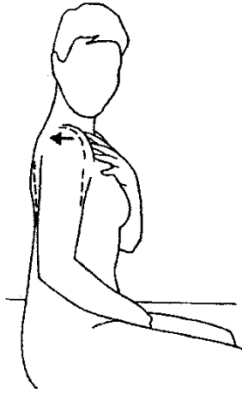

© PhysioTools Ltd

Sit. Place your hand on the front of the opposite shoulder. Feel your shoulder with your fingers making sure that the shoulder does not come forward. Move your shoulder gently 1 cm back and 2 cm up. Later on, exercise is done without palpation or visual confirmation of movement.

Repeat 3 x 15-25 times.

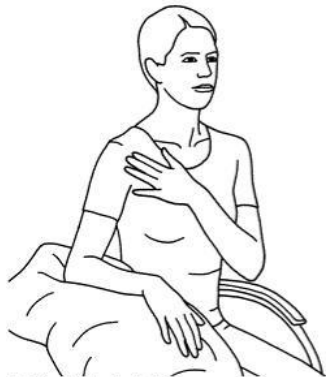

©PhysioTools Ltd

Sit. Place your hand on the front of the opposite shoulder. Feel your shoulder with your fingers. Move your shoulder gently 1 cm forward and 2 up from resting position. Later on, exercise is done without palpation or visual confirmation of movement.

Repeat 3 x 15-25 times.

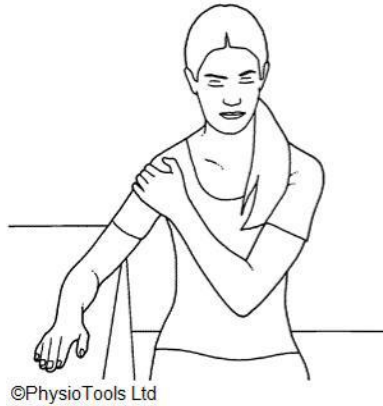

Sit on a chair with your arm supported on a table.  
With your other hand push the top of your upper arm downwards. Hold approx. 2 secs.

Repeat 10 times.

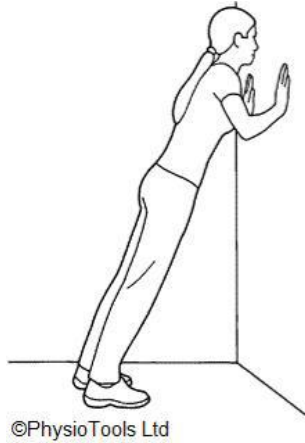

Stand facing a wall with your arms straight and hands on the wall. Do push-ups against the wall keeping your body in a straight line.

Repeat 3 x 15-25 times.



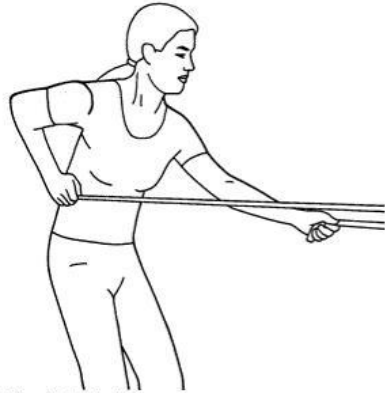

©PhysioTools Ltd

Stand facing a rubber exercise band with your knees and hips slightly bent. Pull the band alternately with the left and right hand keeping the pelvis still.

Repeat 3 x 15-25 times.

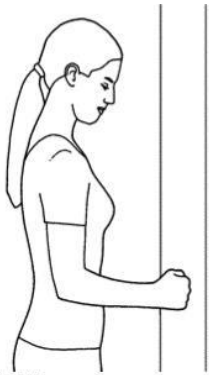

©PhysioTools Ltd

Stand facing a wall. Keep your upper arm close to the side with elbow at a right angle. Push your fist against the wall for 5 secs.

Repeat 3 x 3 times.

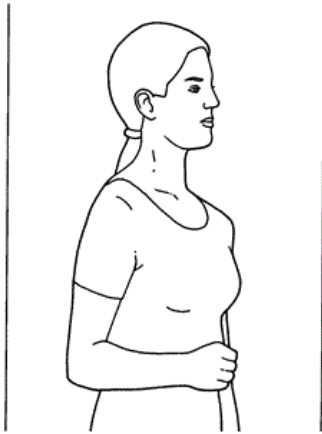

©PhysioTools Ltd

Stand with your back against the wall. Keep your upper arm close to the side and elbow at a right angle. Push the elbow back against the wall and hold for 5 secs.

Repeat 3 x 3 times.

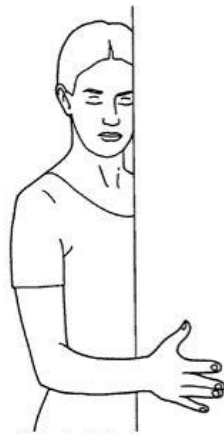

©PhysioTools Ltd

Stand in a doorway with you elbow close to your body and bent at a right angle. Place your hand against the wall. Push your hand inwards against the wall. Hold 5 secs.

Repeat 3 x 3 times.

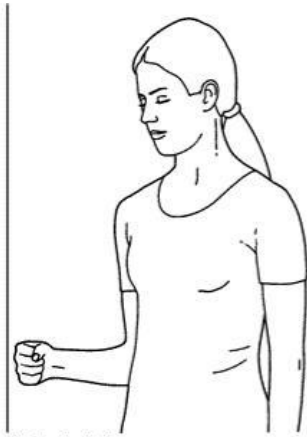

©PhysioTools Ltd

Stand with your upper arm close to your side, elbow at a right angle and the back of your hand against a wall. Push the back of your hand against the wall. Hold approx. 5 secs.

Repeat 3 x 3 times.

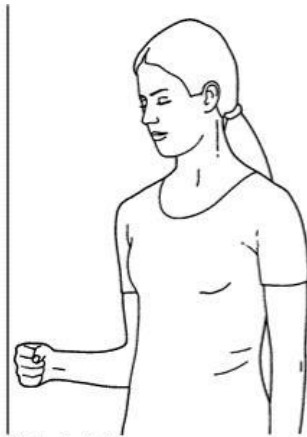

©PhysioTools Ltd

Stand sideways against a wall with your upper arm close to your side and elbow at a right angle. Push the forearm to the side against the wall. Hold approx. 5 secs.

Repeat 3 x 3 times.

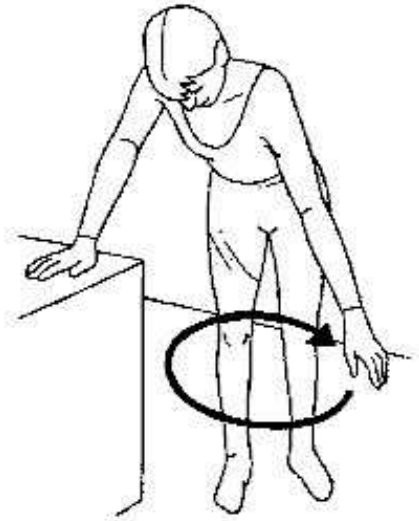

© PhysioTools Ltd

Stand leaning on a table with one hand. Let your other arm hang relaxed straight down. Swing your arm as if drawing a circle on the floor. Change direction.

Continue for 1-2 minutes

**Phase III (6-8 weeks)**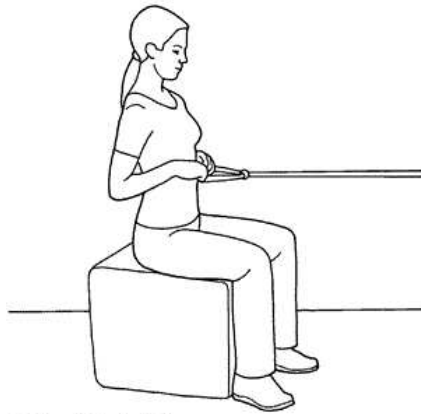

©PhysioTools Ltd

Sit or stand holding on to a rubber exercise band with both hands. Pull the band with both arms pushing the shoulder blades together.

Repeat 3 x 15-25 times.

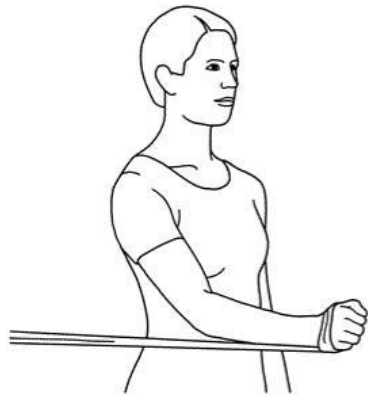

©PhysioTools Ltd

Stand straight holding an exercise band. Move your arm forward, pulling the band. Slowly return.

Repeat 3 x 15-25 times.

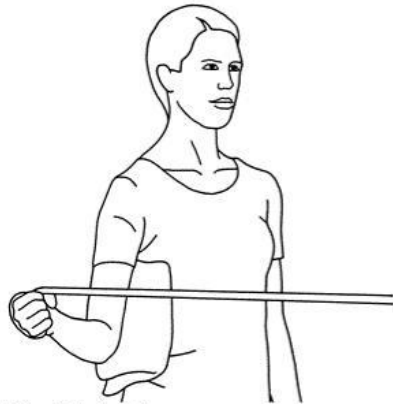

©PhysioTools Ltd

Stand or sit. Place a rolled towel between your upper arm and side. Your upper arm should be slightly forward and your elbow at a right angle. Hold an exercise band. Pull the band taking your forearm out 45 degrees. Hold for 5 secs.

Repeat 3 x 15-25 times.

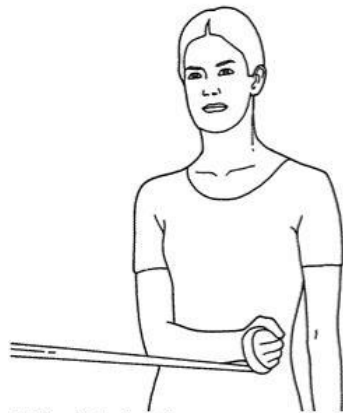

©PhysioTools Ltd

Stand keeping your upper arm close to the side and elbow at a right angle. Hold a rubber exercise band. Pull the band toward your stomach and hold for 5 secs.

Repeat 3 x 15-25 times.

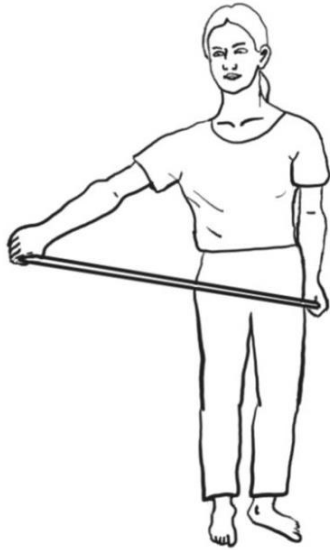

Hold an exercise band with both hands. Pull the band outwards to about 45-60 degrees with back of your hand leading the movement. Hold for 5 secs.

Repeat 3 x 15-25 times

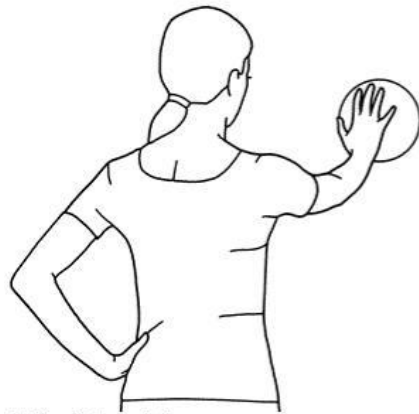

Stand with one foot forward. Keep your back straight. Place the palm of your hand against a wall using a ball or a piece of cloth. Lean your body weight onto your hand. Control your shoulder position and move hand in small horizontal motions.

Repeat 3 x 15-25 times.

©PhysioTools Ltd

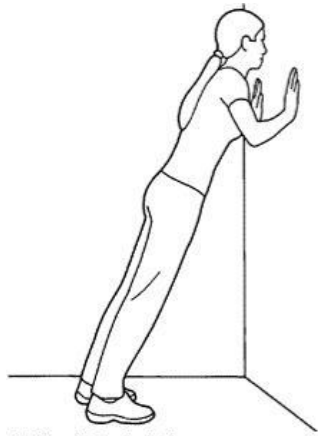

©PhysioTools Ltd

Stand facing a wall with your arms straight and hands on the wall. Do push-ups against the wall keeping your body in a straight line.

Repeat 3 x 15-25 times.



**Phase IV (9-12 weeks)**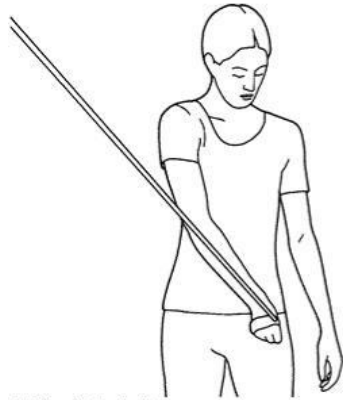

©PhysioTools Ltd

Stand with your arm up and out to the side. Hold a rubber exercise band. Pull the band down and across your body letting your thumb lead the movement.

Repeat 3 x 15-25 times.

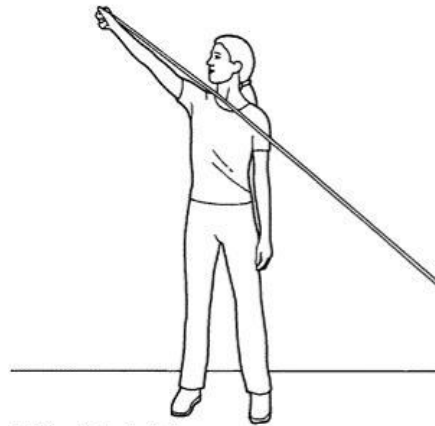

©PhysioTools Ltd

Stand or sit with the hand of the arm to be exercised on your opposite hip. Hold on to a rubber exercise band. Pull the band up towards the opposite side.

Repeat 3 x 15-25 times.

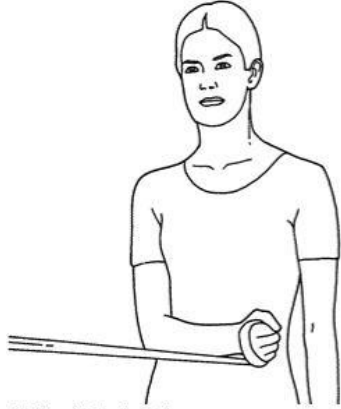

©PhysioTools Ltd

Stand keeping your upper arm close to the side and elbow at a right angle. Hold a rubber exercise band. Pull the band toward your stomach.

Repeat 3 x 15-25 times.

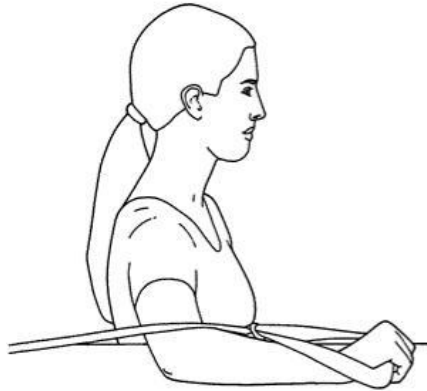

©PhysioTools Ltd

Alternatively,

Sit on a chair with your arm lifted to the side and your elbow at a right angle supported on a table. Hold on to a rubber exercise band which is fastened behind you. Pull the band keeping elbow bent and resting on the table.

Repeat 3 x 15-25 times.

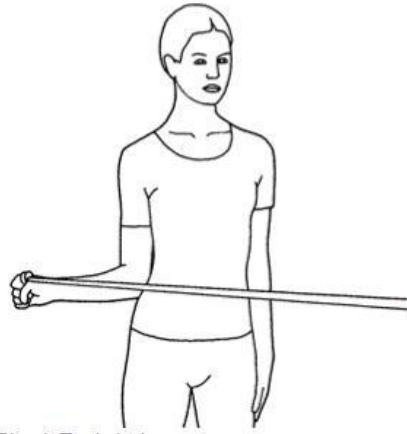

©PhysioTools Ltd

Stand keeping your upper arm close to the side and elbow at a right angle. Hold a rubber exercise band. Pull the band by turning your forearm outwards.

Repeat 3 x 15-25 times.

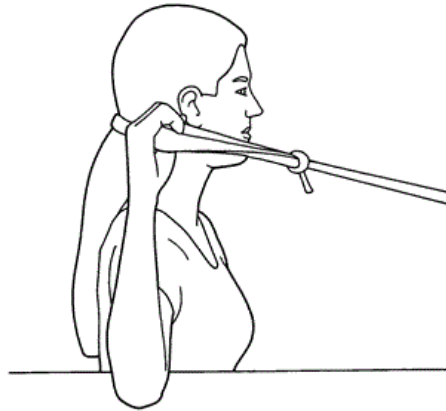

©PhysioTools Ltd

Alternatively,

Sit on a chair with your arm lifted out to the side and elbow at a right angle supported on a table. Hold on to a rubber exercise band which is in front on you. Pull the band keeping your elbow bent and resting on the table.

Repeat 3 x 15-25 times.

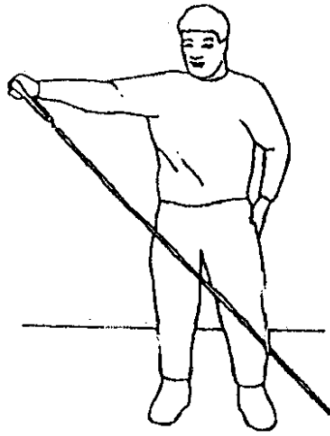

Stand or sit with the hand of the arm to be exercised at your side. Hold on to a rubber exercise band attached at floor level. Pull the band up upwards up to 90 degrees.

Repeat 3 x 15-25 times.

© PhysioTools Ltd

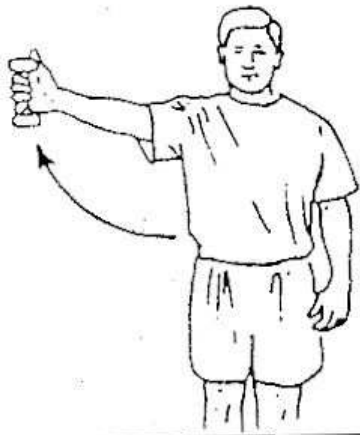

Stand or sit with the hand of the arm to be exercised at your side. Lift hand in thumb up position up to a 90° of abduction.

Repeat 3 x 15-25 times.

© PhysioTools Ltd

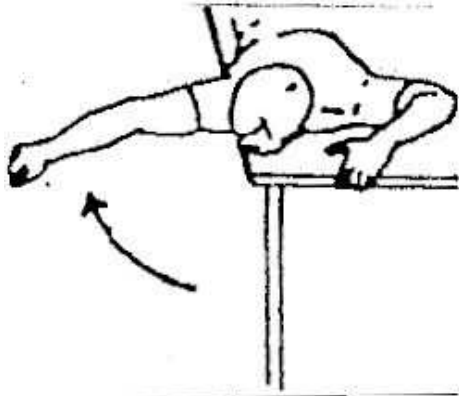

© PhysioTools Ltd

Lying face down with your arms out to the side. Lift your arm toward the ceiling with back of your hand leading the movement.

Repeat 3 x 15-25 times.

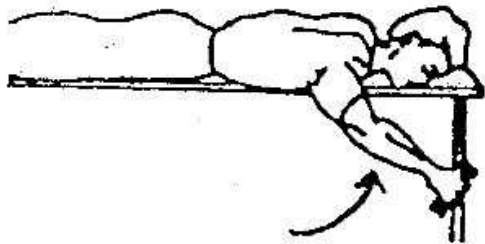

© PhysioTools Ltd

Lying face down with your arms out to the side. Lift your arm forwards up to 100° of flexion with your thumbs leading the movement.

Repeat 3 x 15-25 times.

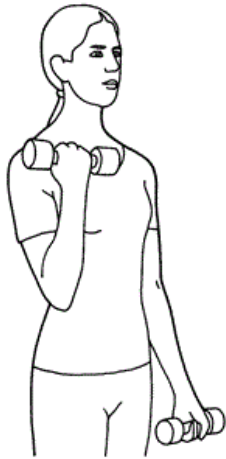

©PhysioTools Ltd

Stand with arms hanging down. Hold a hand weights and turn your palms forward. Bend alternate elbows briskly.

Repeat 3 x 15-25 times.

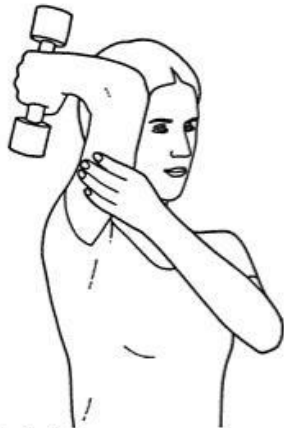

©PhysioTools Ltd

Sit or stand holding a kg hand weight. Bring the arm to be exercised up with the elbow pointing to the ceiling. Support the elbow with the other hand. Straighten the arm holding the weight.

Repeat 3 x 15-25 times.
